# Supplementary material for: Structural, magnetic and phase transition properties in S = ½ radical solid solutions of [FxCl1−x-BzPy][Ni(mnt)2] (x = 0.07–0.87)
Source: Royal Society of Chemistry journal article supplement (doi:10.1039/d3qi00114h), 2023-01-01
Supplement: d3qi00114h1.pdf [file d3qi00114h1.pdf]

## Supporting Information

Structural, magnetic and phase transition properties in  $S = 1/2$  radical solid solutions of  $[F_xCl_{1-x}\text{-BzPy}][\text{Ni}(\text{mnt})_2]$  ( $x = 0.07\text{--}0.87$ )

Wan-Wan Yao,<sup>a</sup> Bin-Bin Ma,<sup>a</sup> Lei Xu,<sup>a</sup> Dong-Sheng Shao,<sup>a</sup> Yin Qian,<sup>a,\*</sup> Wen-Long Liu,<sup>b</sup> Xiao-Ming Ren<sup>\*a,c,d</sup>

<sup>a</sup> State Key Laboratory of Materials-Oriented Chemical Engineering and College of Chemistry and Molecular Engineering, Nanjing Tech University, Nanjing 211816, P. R. China

<sup>b</sup> College of Chemistry and Chemical Engineering, Yangzhou University, Yangzhou 225002, P. R. China

<sup>c</sup> College of Materials Science and Engineering, Nanjing Tech University, Nanjing 211816, P. R. China

<sup>d</sup> State Key Laboratory of Coordination Chemistry, Nanjing University 210023, P. R. China

Email: [yinqian@njtech.edu.cn](mailto:yinqian@njtech.edu.cn) (YQ); [xmren@njtech.edu.cn](mailto:xmren@njtech.edu.cn) (XMR)

## Contents

Fig. S1:  $^1\text{H}$  NMR spectra of (a)  $[\text{F-BzPy}][\text{Ni}(\text{mnt})_2]$  and (b)  $[\text{Cl-BzPy}][\text{Ni}(\text{mnt})_2]$ .

Fig. S2: Schematic illustration of different chemical environments of hydrogen atoms in  $\text{X-BzPy}^+$  ( $\text{X} = \text{F}$  or  $\text{Cl}$ ) cation.

Fig. S3:  $^1\text{H}$  NMR spectra of  $[\text{F}_x\text{Cl}_{1-x}\text{-BzPy}][\text{Ni}(\text{mnt})_2]$  with feed ratio of F to Cl is (a) 1:9, (b) 2:8, (c) 4:6, (d) 5:5, (e) 6:4, (f) 7:3, (g) 8:2, (h) 9:1.

Fig. S4: (a) PXRD patterns of  $[\text{F}_x\text{Cl}_{1-x}\text{-BzPy}][\text{Ni}(\text{mnt})_2]$  ( $x = 0-1$ ). Experimental and simulated PXRD patterns of (b)  $x = 0$ , (c)  $x = 0.07$ , (d)  $x = 0.15$ , (e)  $x = 0.25$ , (f)  $x = 0.39$ , (g)  $x = 0.54$ , (h)  $x = 0.70$ , (i)  $x = 0.74$ , (j)  $x = 0.87$ , (k)  $x = 1$ , where the simulated PXRD pattern was obtained from the single crystal X-ray diffraction data using Mercury3.1 program.

Fig. S5: IR spectra of  $[\text{F}_x\text{Cl}_{1-x}\text{-BzPy}][\text{Ni}(\text{mnt})_2]$  ( $x = 0-1$ ).

Fig. S6: Raman spectra of  $[\text{F}_x\text{Cl}_{1-x}\text{-BzPy}][\text{Ni}(\text{mnt})_2]$  ( $x = 0-1$ ) in the range of (a)  $2400-21\text{ cm}^{-1}$  and (b)  $400-150\text{ cm}^{-1}$ .

Fig. S7: C-F/Cl bond length with  $x$  in  $[\text{F}_x\text{Cl}_{1-x}\text{-BzPy}][\text{Ni}(\text{mnt})_2]$  ( $x = 0-1$ ).

Fig. S8: TG plots of  $[\text{F}_x\text{Cl}_{1-x}\text{-BzPy}][\text{Ni}(\text{mnt})_2]$  ( $x = 0-1$ ) in  $300-1073\text{ K}$ .

Fig. S9: Plots of  $\chi_m-T$  for  $[\text{F}_x\text{Cl}_{1-x}\text{-BzPy}][\text{Ni}(\text{mnt})_2]$  ( $x = 0-1$ ) in  $2-300\text{ K}$  (the black squares represent the experimental data; the red and blue lines represent the theoretically reproduced curves and the details see the main text).

Fig. S10: Plots of  $\chi_{\text{chain}}T-T$  for  $[\text{F}_x\text{Cl}_{1-x}\text{-BzPy}][\text{Ni}(\text{mnt})_2]$  ( $x = 0-1$ ), where  $\chi_{\text{chain}}$  was acquired by  $\chi_m$  subtracting the  $C/(T-\theta)$  and  $\chi_0$  terms and these terms were obtained by fitting the  $\chi_m$  in LTP (see Main text and Table S3).

Fig. S11: Plots of  $\chi_m-T$  for  $[\text{F}_x\text{Cl}_{1-x}\text{-BzPy}][\text{Ni}(\text{mnt})_2]$  ( $x = 0-1$ ) in  $2-300\text{ K}$  (the black squares represent the experimental data; the red and blue lines represent the theoretically reproduced curves in HTP and the parameters acquired from fit using Eq. (4) or Eq. (7) or Curie-Weiss law together with an additional  $\chi_0$  term, ref. main text and Table S5 and S6).

Fig. S12: Plots of  $\chi_{\text{chain}}T-T$  for  $[\text{F}_x\text{Cl}_{1-x}\text{-BzPy}][\text{Ni}(\text{mnt})_2]$  ( $x = 0-1$ ), herein, each plot of  $\chi_{\text{chain}}-T$  is the same as that in Fig. S11 for each salt, and the  $\chi_{\text{chain}}$  was corrected by  $\chi_0$  obtained by fitting the  $\chi_m$  in HTP using uniform  $S = 1/2$  FM or AFM spin chain

magnetic susceptibility equation with an additional  $\chi_0$  (see Main text and Table S5).

Fig. S13: Change of  $T_C$  and  $V$  with  $x$  in  $[\text{F}_x\text{Cl}_{1-x}\text{-BzPy}][\text{Ni}(\text{mnt})_2]$  ( $x = 0-1$ ).

Fig. S14: The stacking mode of two superimposed anions in a stack of  $[\text{F}_x\text{Cl}_{1-x}\text{-BzPy}][\text{Ni}(\text{mnt})_2]$  ( $x = 0-1$ ).

Fig. S15: Side views of an anion stack along (a, b)  $a+c$  and  $b$ -axis directions, respectively, showing the equal Ni...Ni distances of neighboring anions. (c) Side view of mean-molecule plane of  $[\text{Ni}(\text{mnt})_2]^-$  defined by four sulphur atoms. Plots of (d) CN...H distance with  $x$  in  $[\text{F}_x\text{Cl}_{1-x}\text{-BzPy}][\text{Ni}(\text{mnt})_2]$  ( $x = 0-1$ ).

Table S1: Crystallographic data for compounds  $[\text{F}_x\text{Cl}_{1-x}\text{-BzPy}][\text{Ni}(\text{mnt})_2]$  ( $x = 0-1$ ) at ambient temperature

Table S2: Coordinated bond lengths ( $\text{\AA}$ ) and angles ( $^\circ$ ) in an anionic moiety for  $[\text{F}_x\text{Cl}_{1-x}\text{-BzPy}][\text{Ni}(\text{mnt})_2]$  ( $x = 0-1$ )

Table S3: The parameters ( $\alpha$ ,  $\Delta/k_B$ ,  $C$  and  $\theta$ ) obtained by fitting the temperature dependent magnetic susceptibilities in LTP

Table S4: The parameter  $J/k_B$  and temperature range of fitted susceptibility data in HTP

Table S5: The parameter  $J/k_B$  and temperature range of fitted susceptibility data in HTP

Table S6: The parameter  $\theta$  and temperature ranges of susceptibility data fitted in HTP

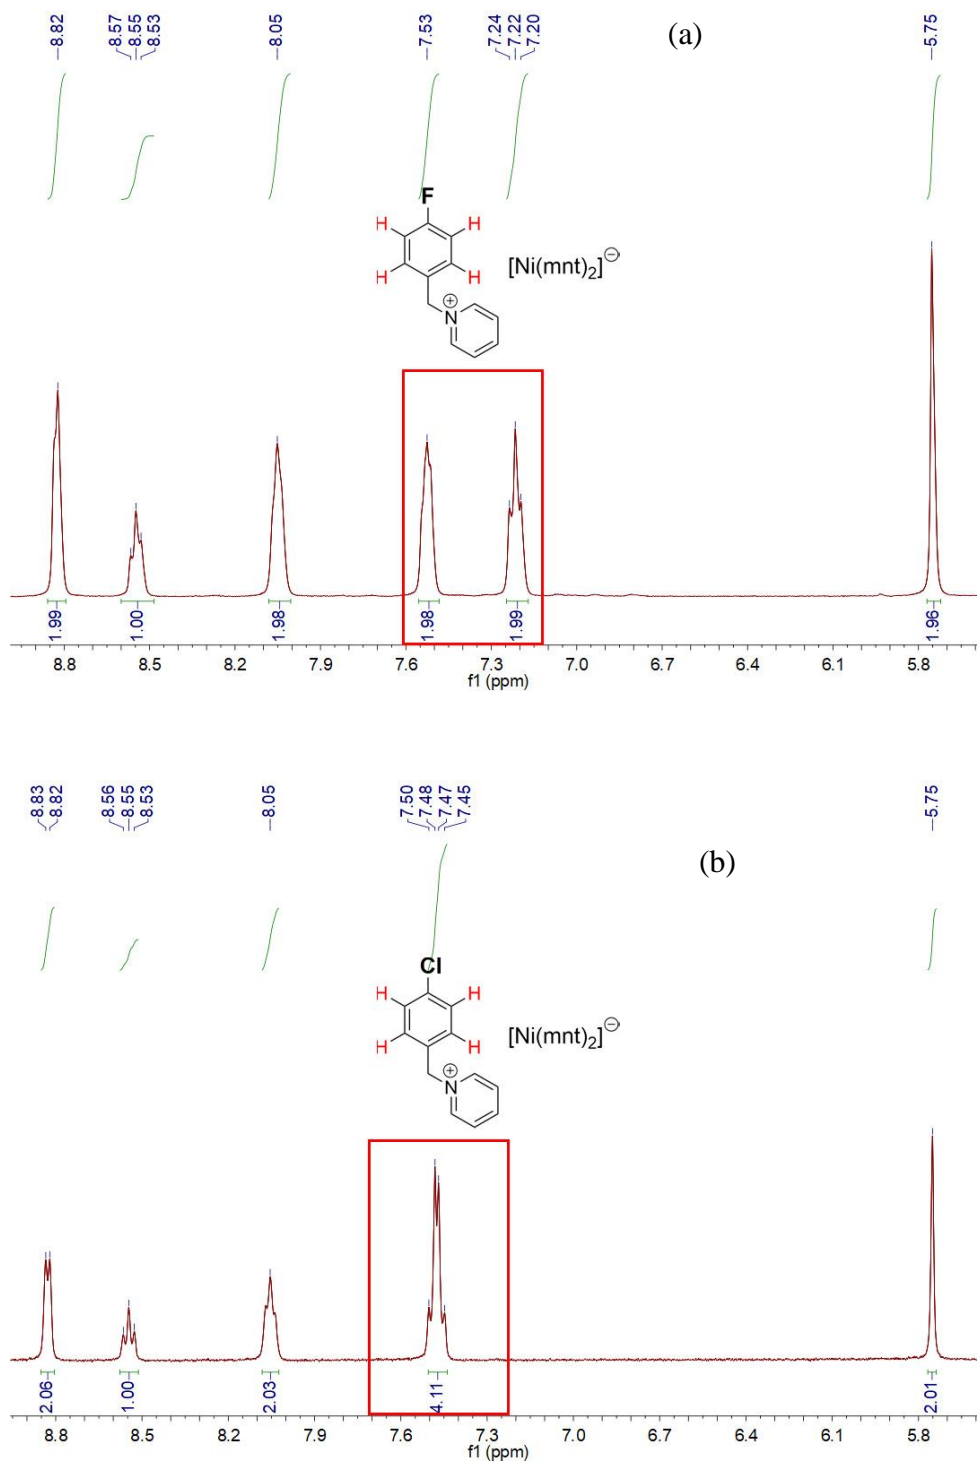

Fig. S1:  $^1\text{H}$  NMR spectra of (a)  $[\text{F-BzPy}][\text{Ni}(\text{mnt})_2]$  and (b)  $[\text{Cl-BzPy}][\text{Ni}(\text{mnt})_2]$ .

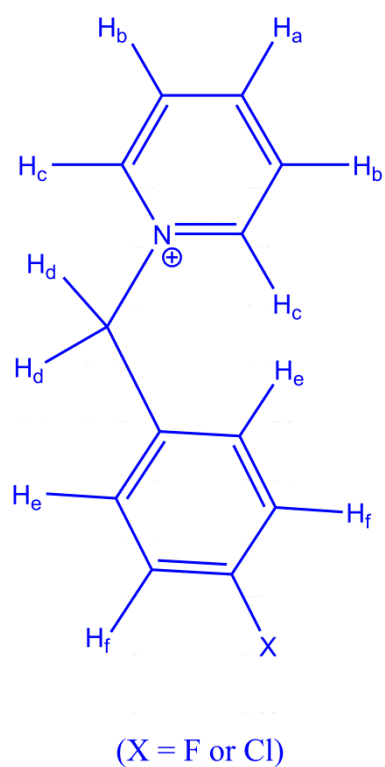

Fig. S2: Schematic illustration of different chemical environments of hydrogen atoms in  $X\text{-BzPy}^+$  ( $X = \text{F}$  or  $\text{Cl}$ ) cation.

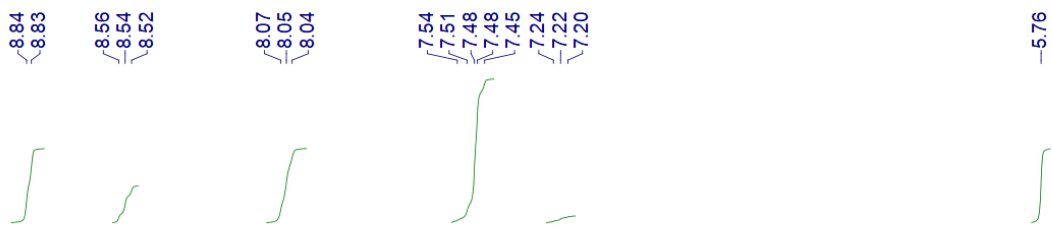

(a)

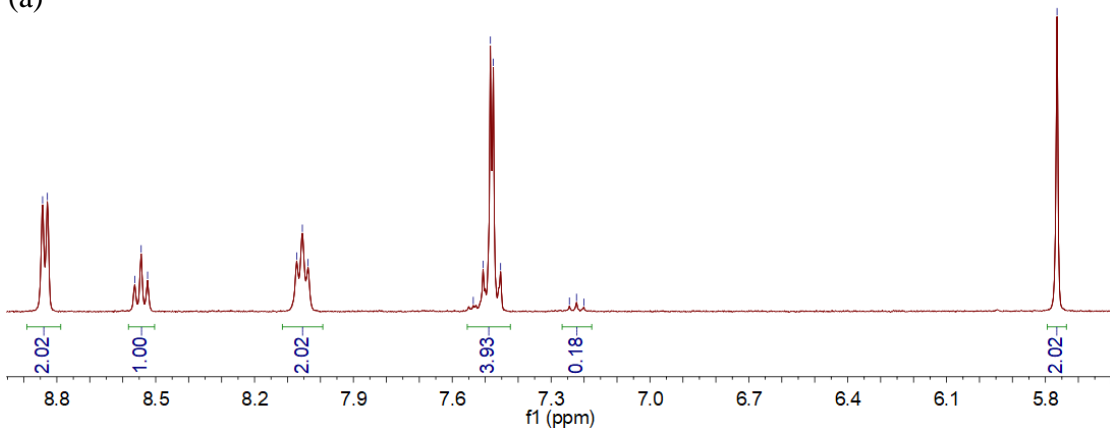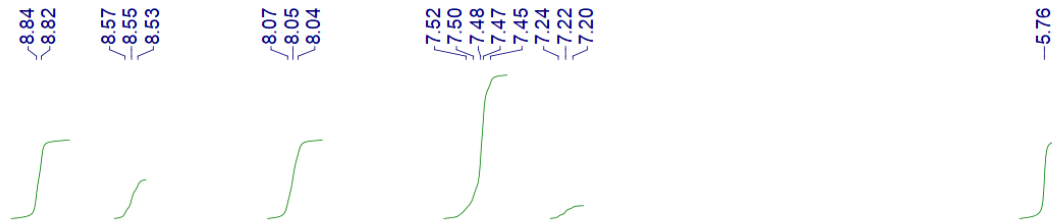

(b)

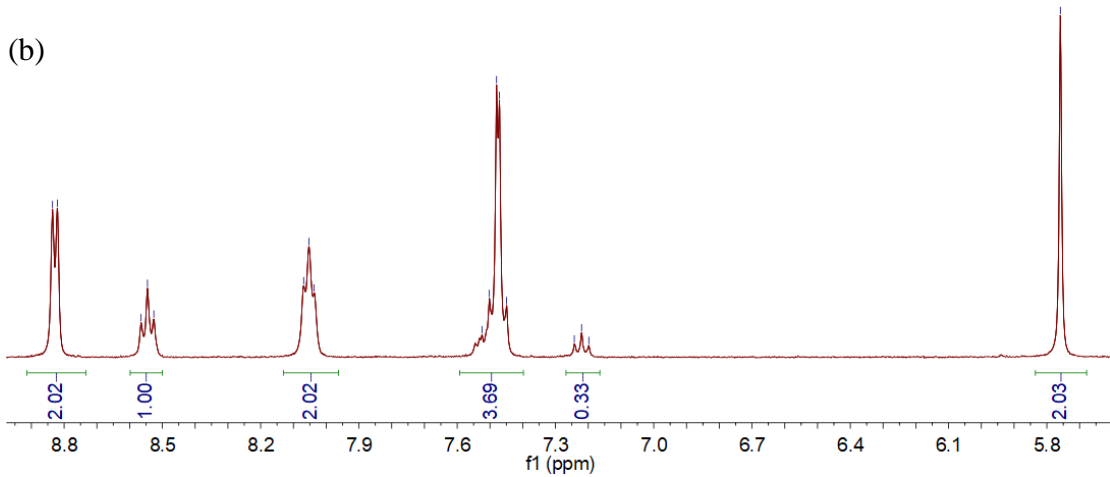

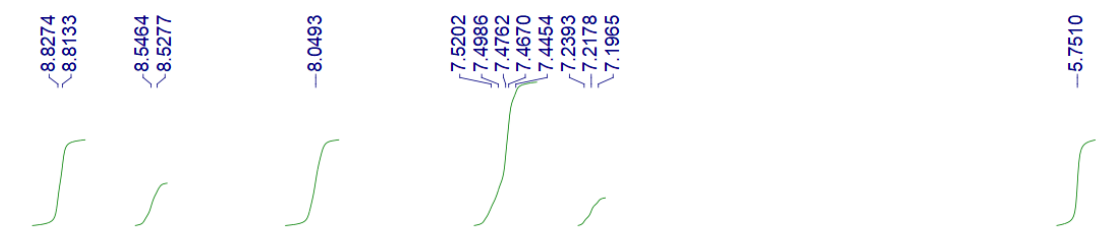

(c)

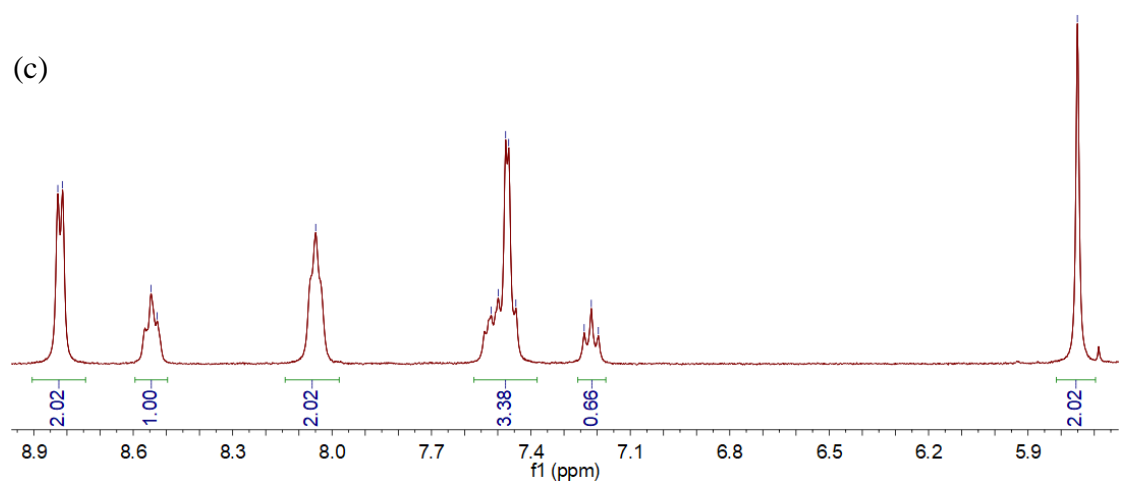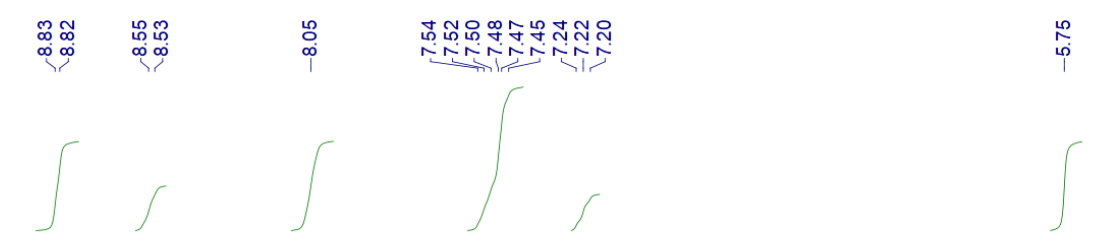

(d)

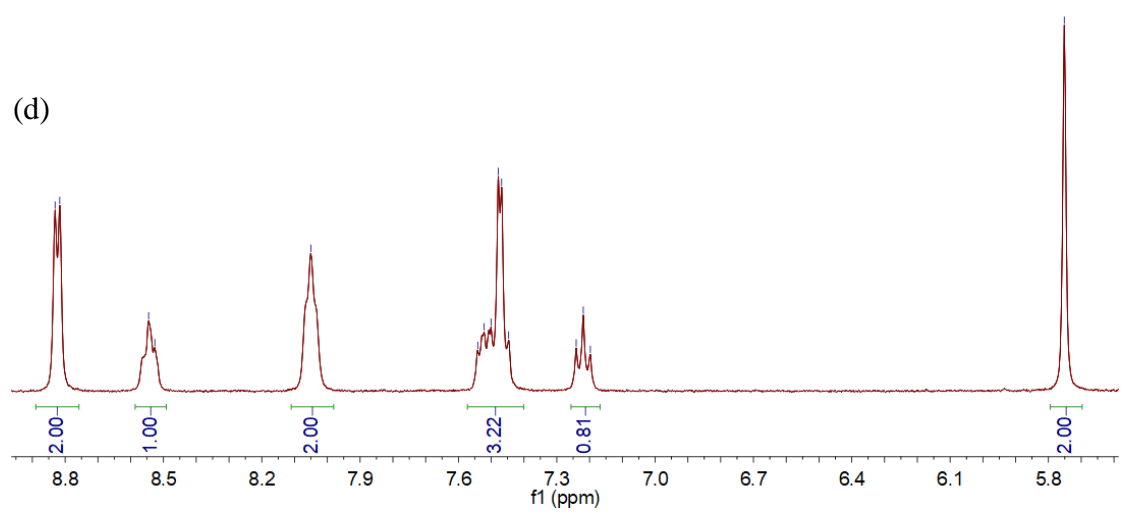

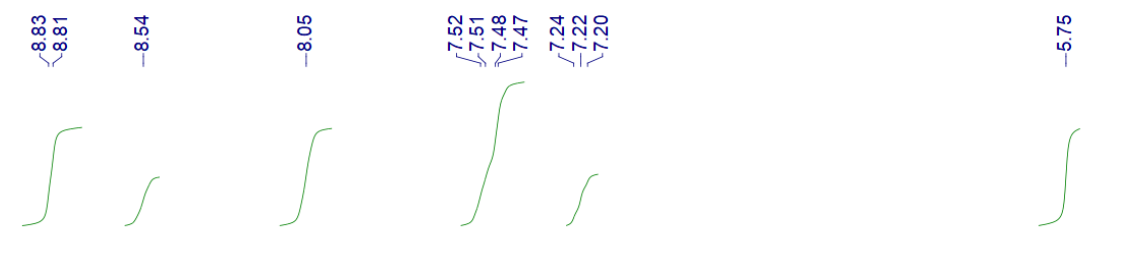

(e)

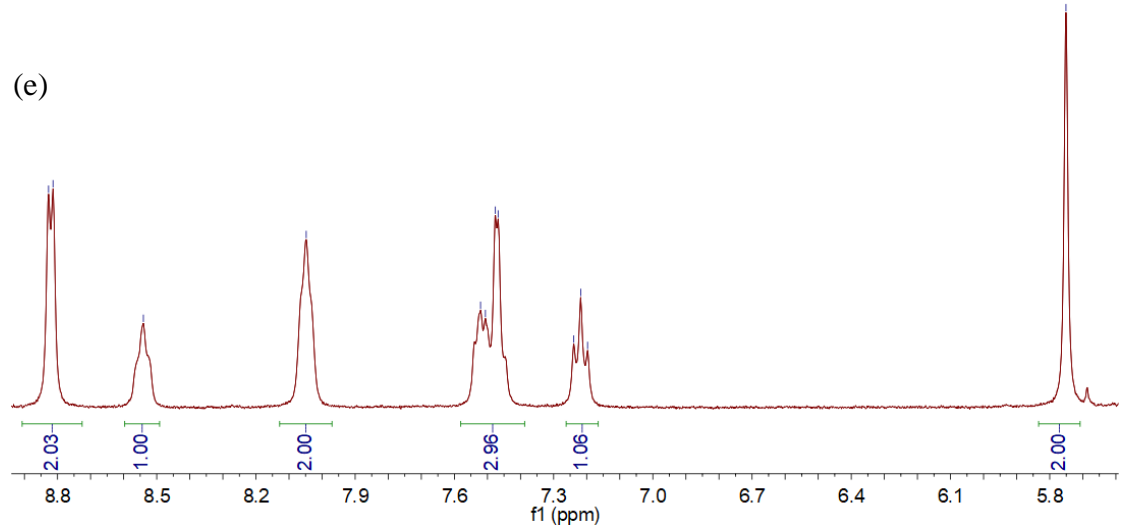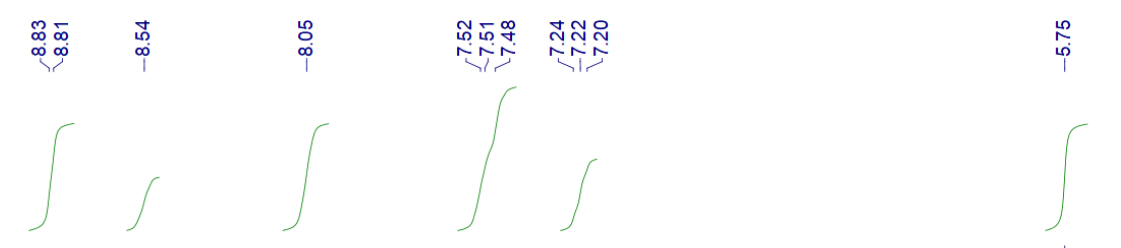

(f)

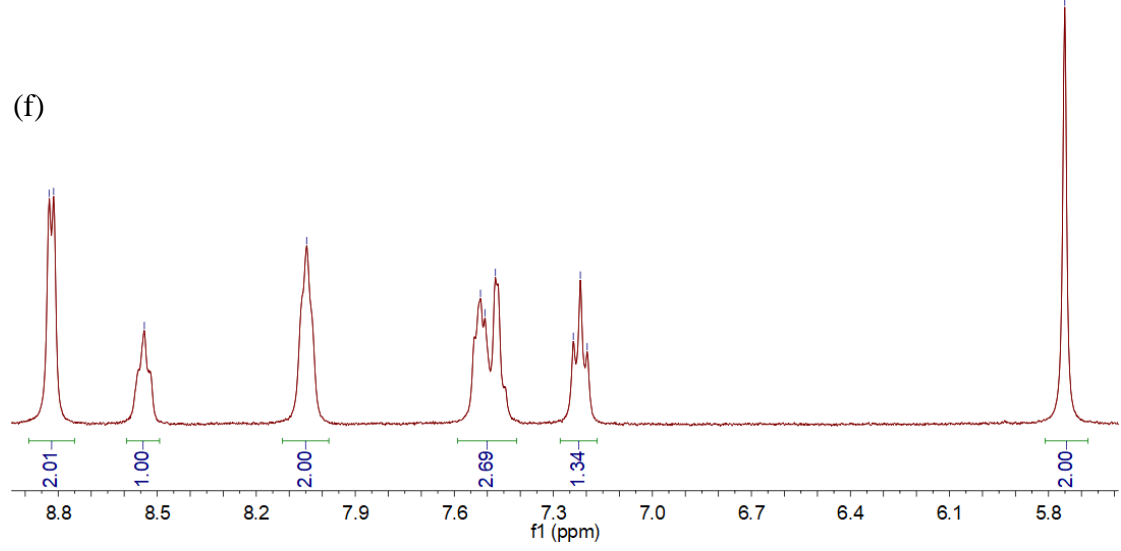



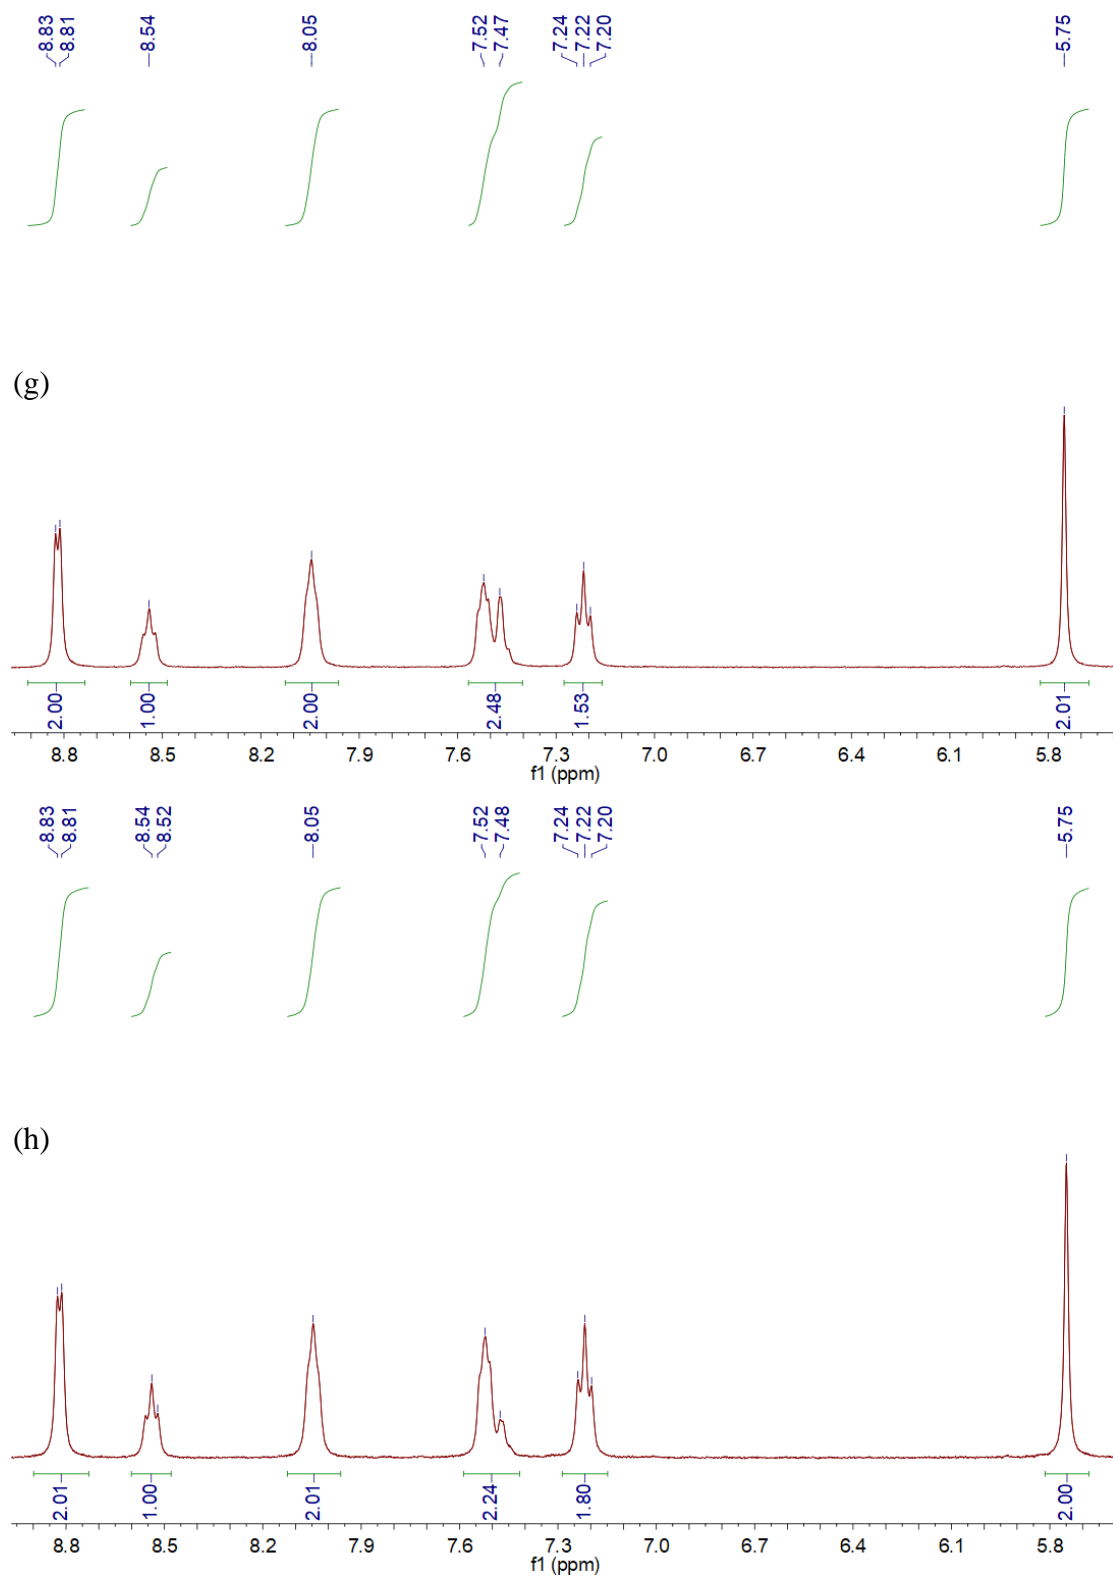

Fig. S3:  $^1\text{H}$  NMR spectra of  $[\text{F}_x\text{Cl}_{1-x}\text{-BzPy}][\text{Ni}(\text{mnt})_2]$  with feed ratio of F to Cl is (a) 1:9, (b) 2:8, (c) 4:6, (d) 5:5, (e) 6:4, (f) 7:3, (g) 8:2, (h) 9:1.

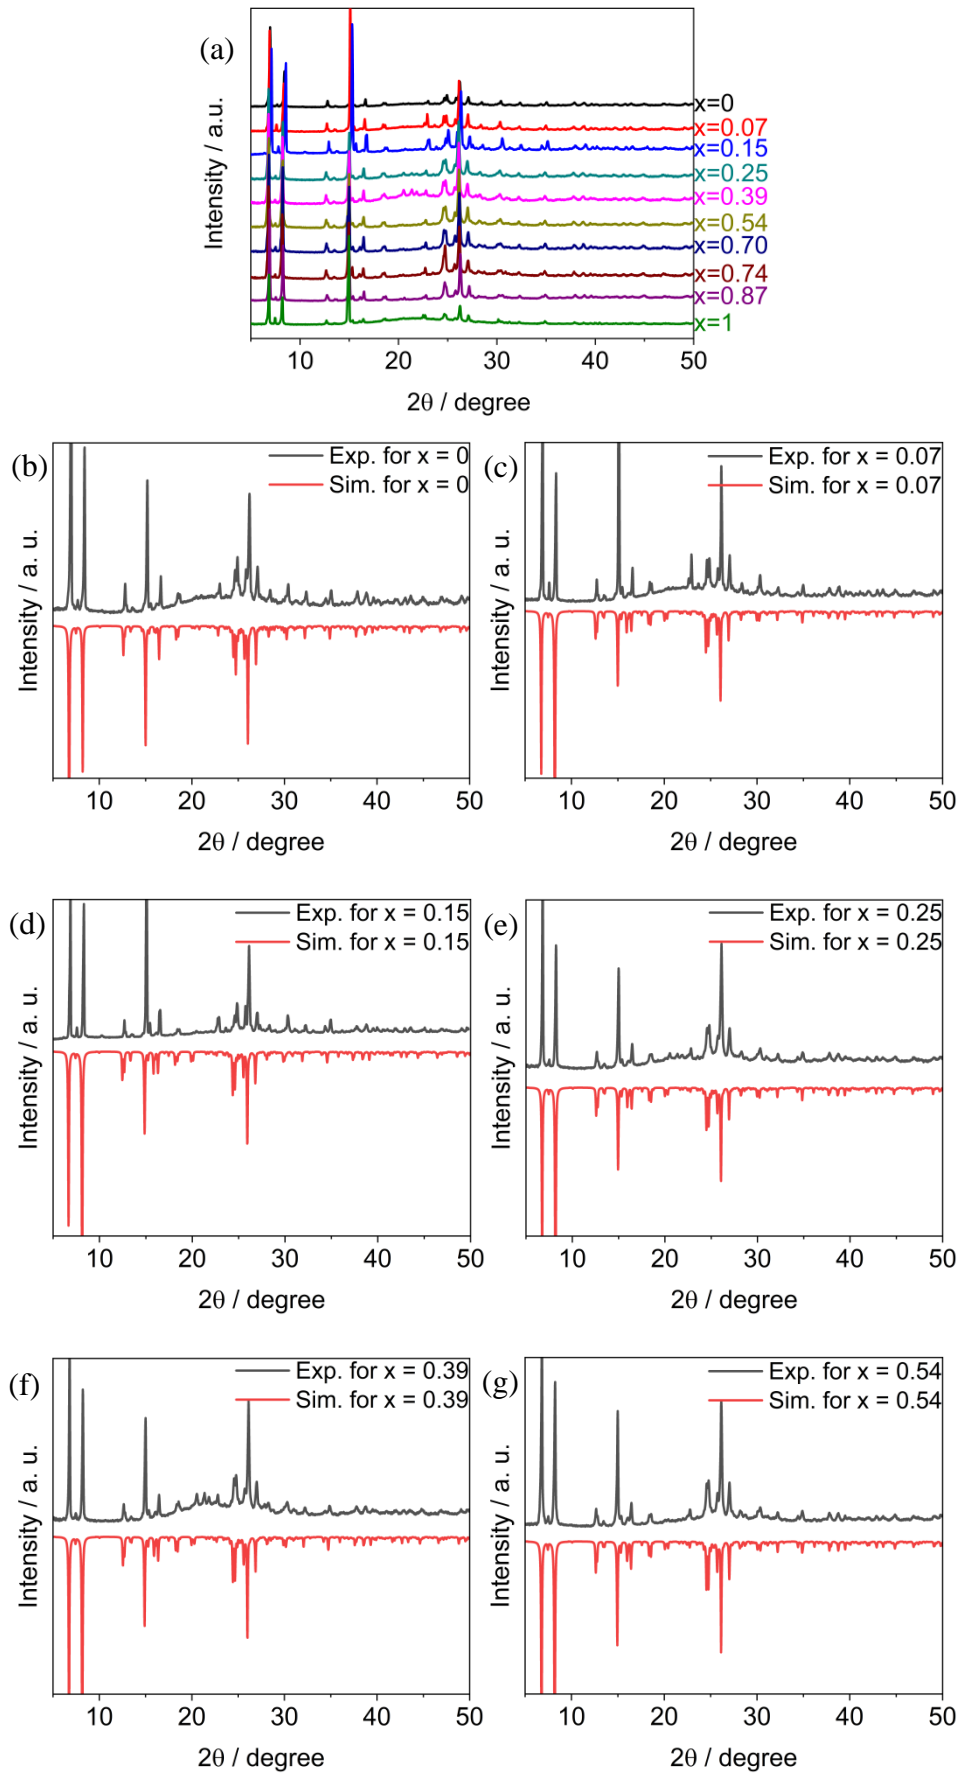

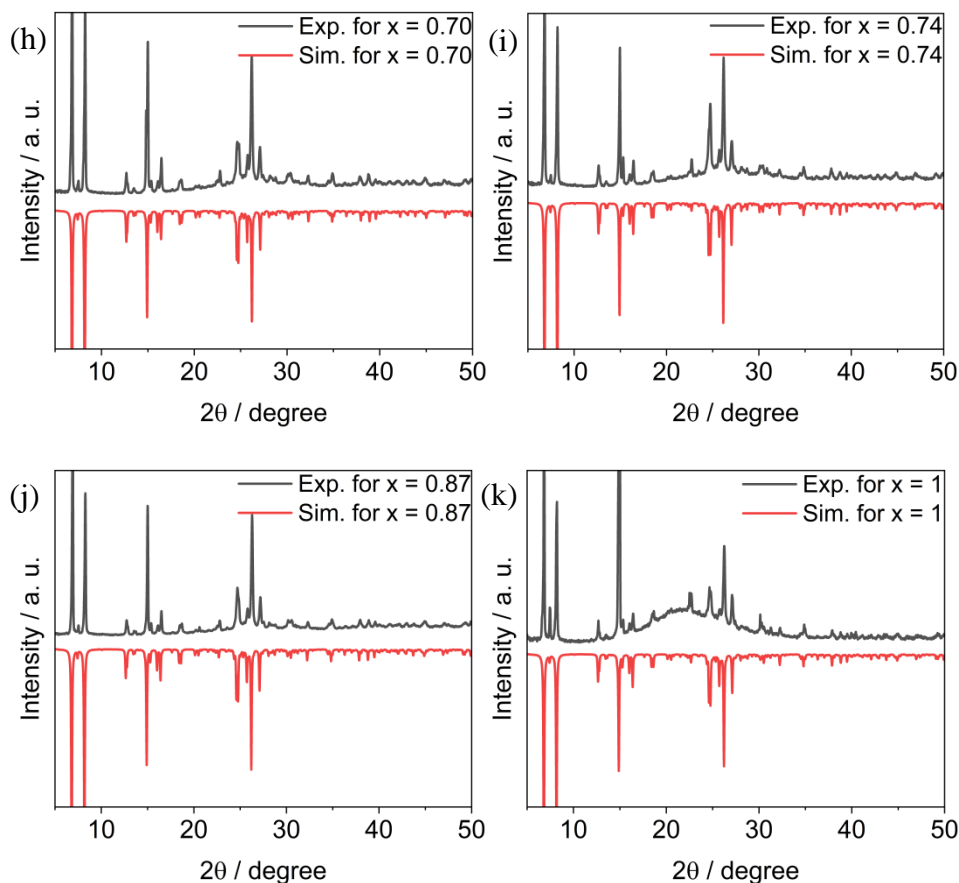

Fig. S4: (a) PXRD patterns of  $[F_xCl_{1-x}BzPy][Ni(mnt)_2]$  ( $x = 0-1$ ). Experimental and simulated PXRD patterns of (b)  $x = 0$ , (c)  $x = 0.07$ , (d)  $x = 0.15$ , (e)  $x = 0.25$ , (f)  $x = 0.39$ , (g)  $x = 0.54$ , (h)  $x = 0.70$ , (i)  $x = 0.74$ , (j)  $x = 0.87$ , (k)  $x = 1$ , where the simulated PXRD pattern was obtained from the single crystal X-ray diffraction data using Mercury3.1 program.

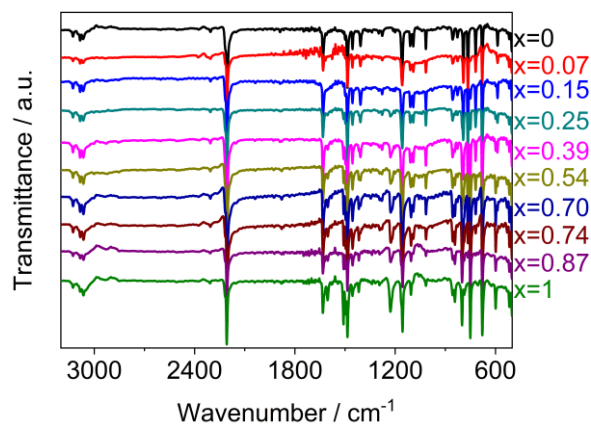

Fig. S5: IR spectra of  $[F_xCl_{1-x}BzPy][Ni(mnt)_2]$  ( $x = 0-1$ ).

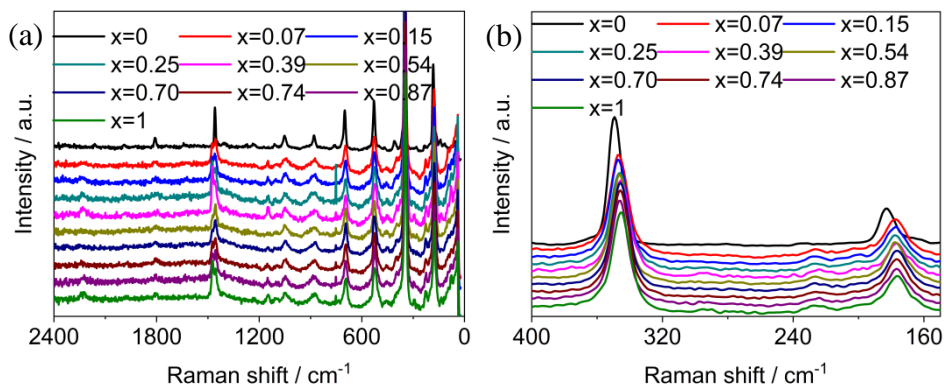

Fig. S6: Raman spectra of  $[F_xCl_{1-x}\text{-BzPy}][\text{Ni}(\text{mnt})_2]$  ( $x = 0-1$ ) in the range of (a)  $2400-21 \text{ cm}^{-1}$  and (b)  $400-150 \text{ cm}^{-1}$ .

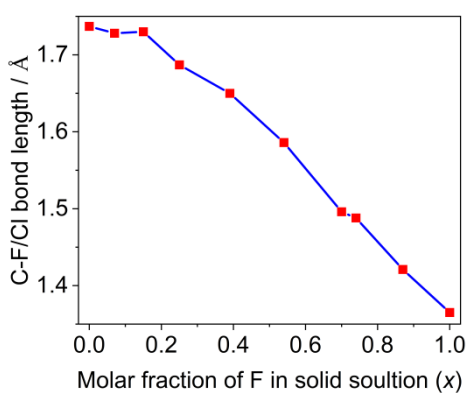

Fig. S7: C-F/Cl bond length with  $x$  in  $[F_xCl_{1-x}\text{-BzPy}][\text{Ni}(\text{mnt})_2]$  ( $x = 0-1$ ).

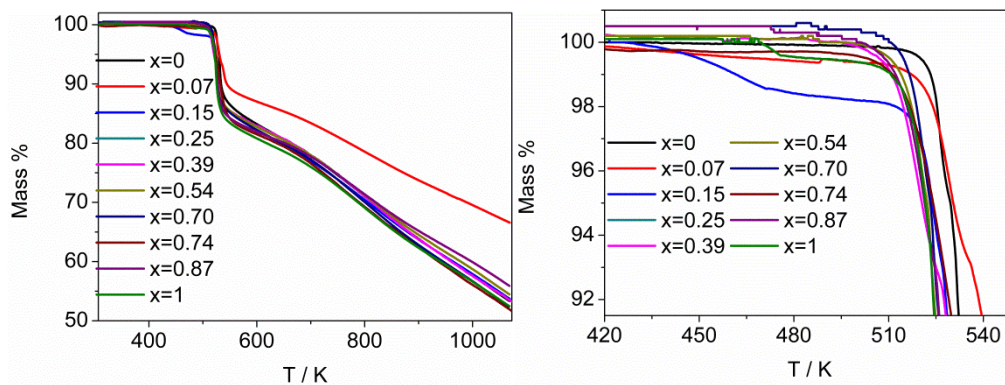

Fig. S8: TG plots of  $[F_xCl_{1-x}\text{-BzPy}][\text{Ni}(\text{mnt})_2]$  ( $x = 0-1$ ) in  $300-1073 \text{ K}$ .

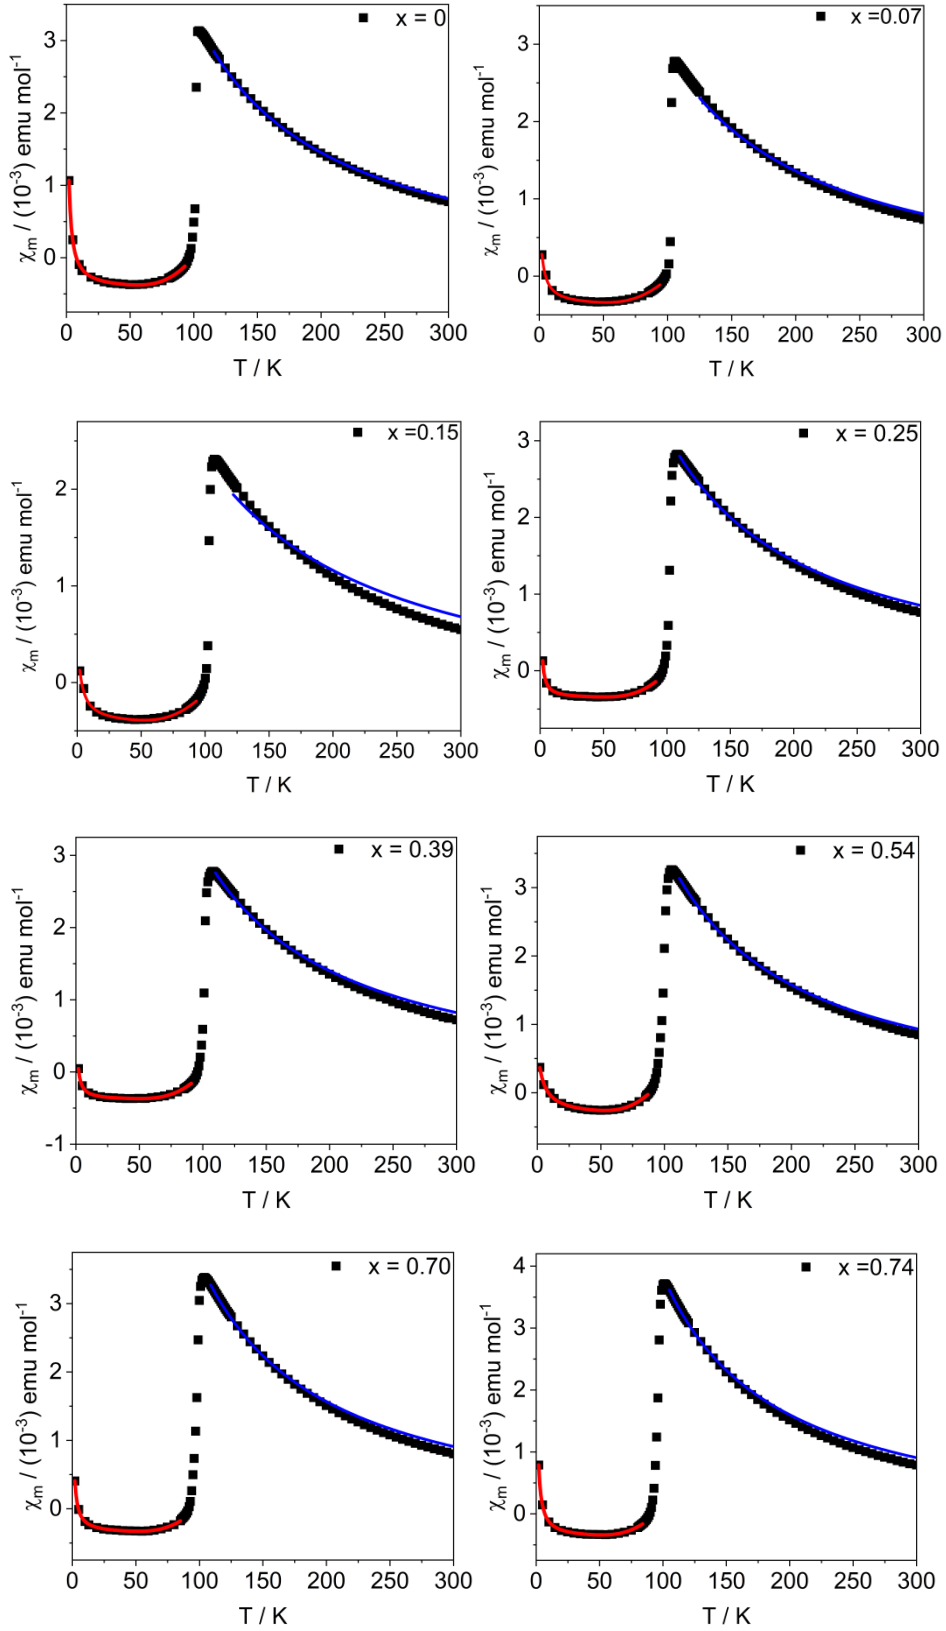

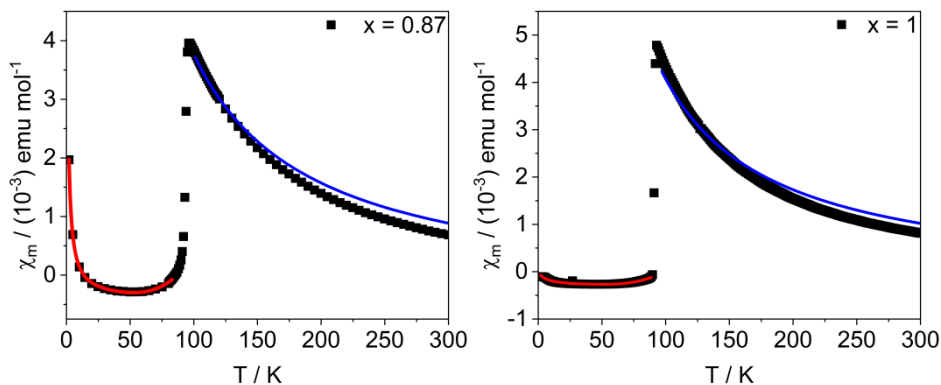

Fig. S9: Plots of  $\chi_m-T$  for  $[F_xCl_{1-x}BzPy][Ni(mnt)_2]$  ( $x = 0-1$ ) in 2–300 K (the black squares represent the experimental data; the red and blue lines represent the theoretically reproduced curves and the details see the main text).

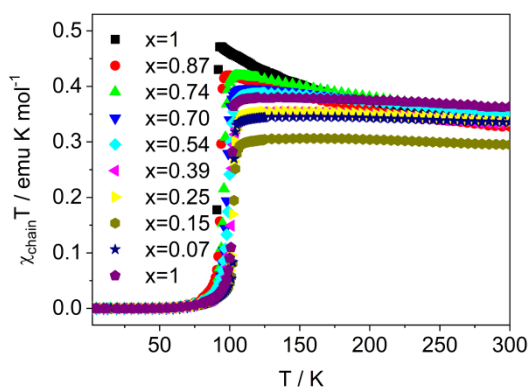

Fig. S10: Plots of  $\chi_{\text{chain}}T-T$  for  $[F_xCl_{1-x}BzPy][Ni(mnt)_2]$  ( $x = 0-1$ ), where  $\chi_{\text{chain}}$  was acquired by  $\chi_m$  subtracting the  $C/(T-\theta)$  and  $\chi_0$  terms and these terms were obtained by fitting the  $\chi_m$  in LTP (see Main text and Table S3).

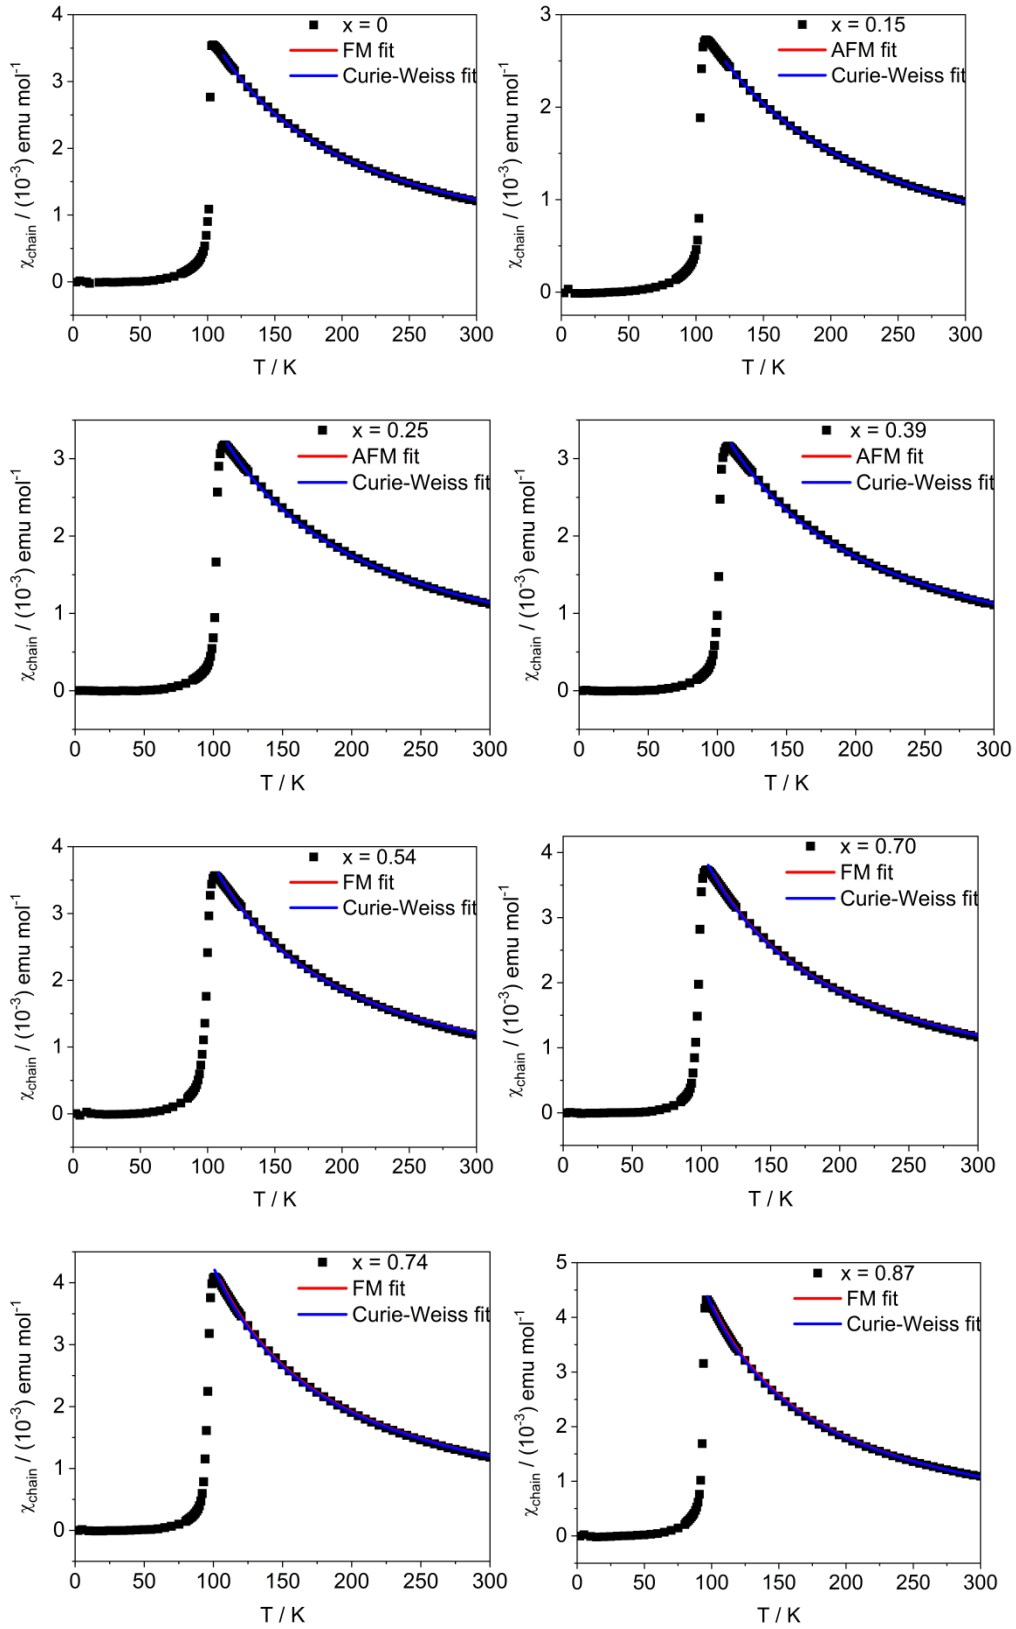

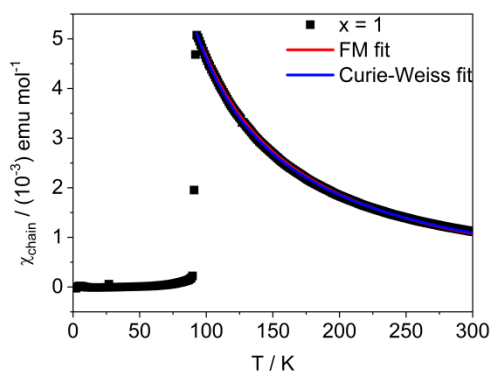

Fig. S11: Plots of  $\chi_m-T$  for  $[F_xCl_{1-x}BzPy][Ni(mnt)_2]$  ( $x = 0-1$ ) in 2–300 K (the black squares represent the experimental data; the red and blue lines represent the theoretically reproduced curves in HTP and the parameters acquired from fit using Eq. (4) or Eq. (7) or Curie-Weiss law together with an additional  $\chi_0$  term, ref. main text and Table S5 and S6).

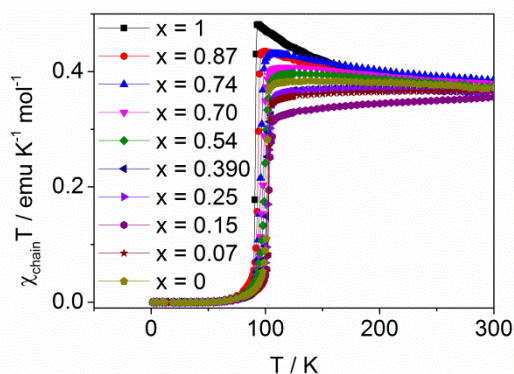

Fig. S12: Plots of  $\chi_{chain}T-T$  for  $[F_xCl_{1-x}BzPy][Ni(mnt)_2]$  ( $x = 0-1$ ), herein, each plot of  $\chi_{chain}-T$  is the same as that in Fig. S11 for each salt, and the  $\chi_{chain}$  was corrected by  $\chi_0$  obtained by fitting the  $\chi_m$  in HTP using uniform  $S = \frac{1}{2}$  FM or AFM spin chain magnetic susceptibility equation with an additional  $\chi_0$  (see Main text and Table S5).

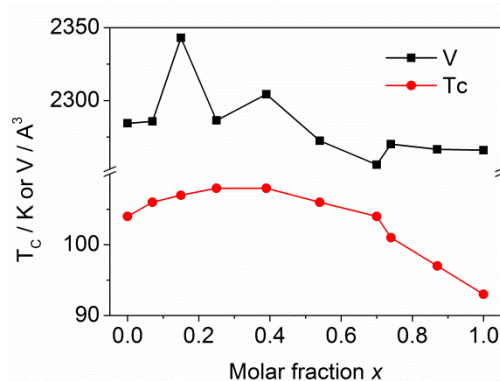

Fig. S13: Change of  $T_C$  and  $V$  with  $x$  in  $[F_xCl_{1-x}BzPy][Ni(mnt)_2]$  ( $x = 0-1$ ).



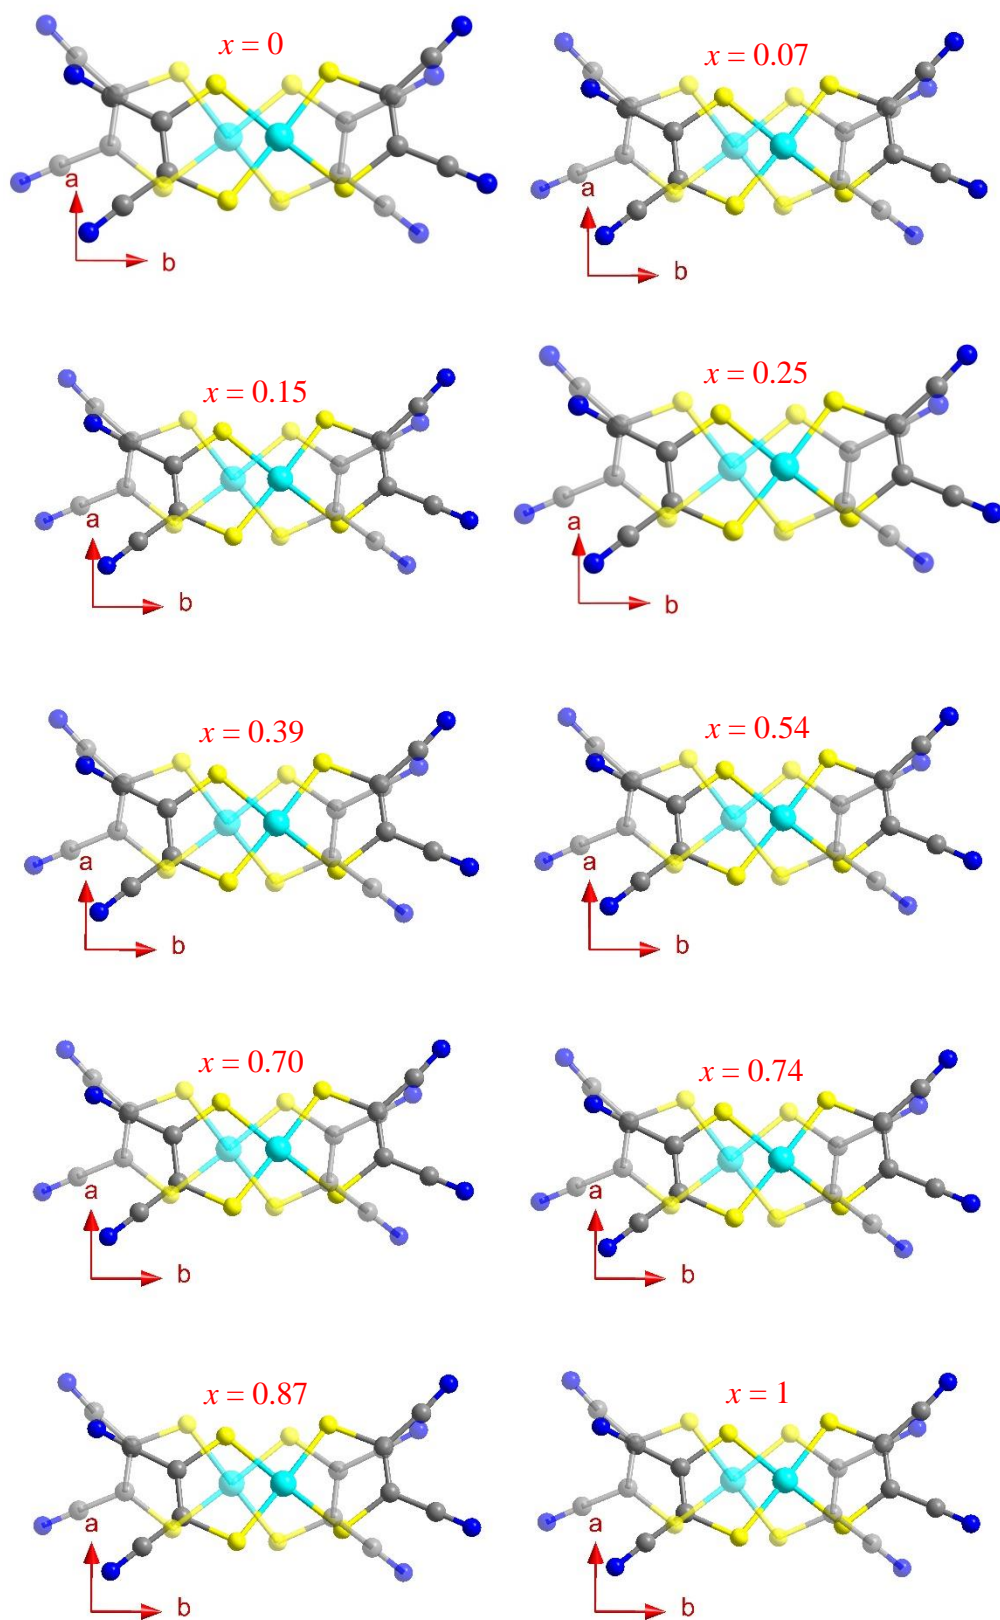

Fig. S14: The stacking mode of two superimposed anions in a stack of  $[F_xCl_{1-x}\text{-BzPy}][\text{Ni}(\text{mnt})_2]$  ( $x = 0-1$ ).

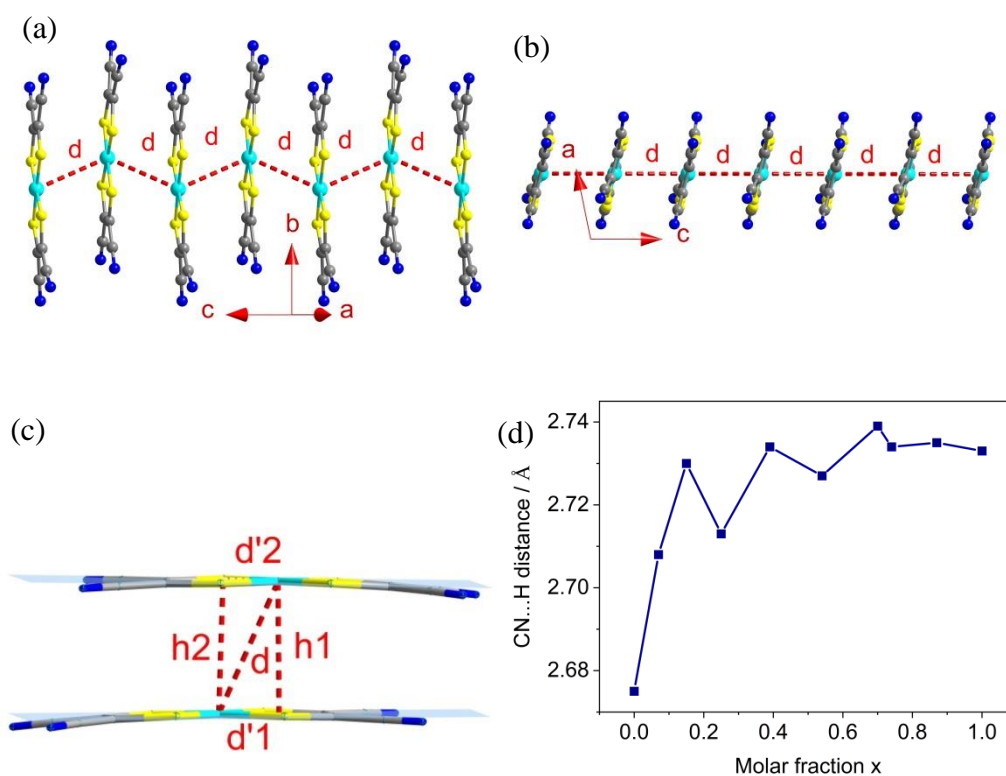

Fig. S15: Side views of an anion stack along (a, b)  $a+c$  and  $b$ -axis directions, respectively, showing the equal Ni...Ni distances of neighboring anions. (c) Side view of mean-molecule plane of  $[\text{Ni}(\text{mnt})_2]^-$  defined by four sulphur atoms. Plots of (d) CN...H distance with  $x$  in  $[\text{F}_x\text{Cl}_{1-x}\text{-BzPy}][\text{Ni}(\text{mnt})_2]$  ( $x = 0-1$ ).

Table S1: Crystallographic data for compounds  $[F_xCl_{1-x}\text{-BzPy}][\text{Ni}(\text{mnt})_2]$  ( $x = 0\text{--}1$ ) at ambient temperature

| $x$                                    | 0                                  | 0.07                               | 0.15                               | 0.25                               |
|----------------------------------------|------------------------------------|------------------------------------|------------------------------------|------------------------------------|
| Temp. / K                              | 296(2)                             | 293(2)                             | 293(2)                             | 293(2)                             |
| Wavelength / Å                         | 0.71073                            | 0.71073                            | 0.71073                            | 0.71073                            |
| Formula weight                         | 543.74                             | 542.54                             | 541.30                             | 539.69                             |
| Space group                            | $P2_1/c$                           | $P2_1/c$                           | $P2_1/c$                           | $P2_1/c$                           |
| CCDC no.                               | 158525                             | 2210261                            | 2210274                            | 2210275                            |
| Crystal system                         | Monoclinic                         | Monoclinic                         | Monoclinic                         | Monoclinic                         |
| $a$ / Å                                | 12.105(2)                          | 12.108(2)                          | 12.201(10)                         | 12.1300(4)                         |
| $b$ / Å                                | 26.218(4)                          | 26.230(5)                          | 26.520(19)                         | 26.1989(9)                         |
| $c$ / Å                                | 7.374(2)                           | 7.3716(11)                         | 7.410(6)                           | 7.3663(2)                          |
| $\beta$ / °                            | 102.55(2)                          | 102.496(5)                         | 102.32(3)                          | 102.4024(11)                       |
| $V$ / Å <sup>3</sup> , $Z$             | 2284.2(9), 4                       | 2285.7(7), 4                       | 2343(3), 4                         | 2286.33(13), 4                     |
| $\rho$ / g·cm <sup>-3</sup>            | 1.581                              | 1.577                              | 1.535                              | 1.568                              |
| $\mu$ / mm <sup>-1</sup>               | 1.350                              | 1.341                              | 1.301                              | 1.322                              |
| $F(000)$                               | 1100                               | 1098                               | 1095                               | 1092                               |
| $\theta$ Range for data collection (°) | 1.89–25.00                         | 2.319–25.499                       | 2.297– 25.210                      | 2.898–25.497                       |
|                                        | $-14 \leq h \leq 14$               |
| Index ranges                           | $-31 \leq k \leq 1$                | $-31 \leq k \leq 31$               | $-31 \leq k \leq 31$               | $-31 \leq k \leq 31$               |
|                                        | $-1 \leq l \leq 8$                 | $-8 \leq l \leq 8$                 | $-8 \leq l \leq 8$                 | $-8 \leq l \leq 8$                 |
| $R_{\text{int}}$                       | 0.0455                             | 0.0899                             | 0.0956                             | 0.0490                             |
| Reflect./restraints/parameters         | 3997 / 0 / 294                     | 4241 / 0 / 281                     | 4176 / 0 / 281                     | 4248 / 0 / 281                     |
| Refinement method                      | Full-matrix least-squares on $F^2$ |
| Goodness of fit on $F^2$               | 1.023                              | 1.031                              | 1.019                              | 1.107                              |
| $R_1, wR_2^a$ [ $I > 2\sigma(I)$ ]     | 0.0460,<br>0.1065                  | 0.0352,<br>0.0716                  | 0.0393, 0.1011                     | 0.0387,<br>0.0791                  |
| $R_1, wR_2^a$ [all data]               | 0.0773,<br>0.1226                  | 0.0585,<br>0.0779                  | 0.0560,<br>0.1081                  | 0.0509,<br>0.0830                  |
| Residual / e·Å <sup>-3</sup>           | 0.457/-0.426                       | 0.282/-0.348                       | 0.512/-0.411                       | 0.282/-0.342                       |

Continue to Table S1

| <i>x</i>                                                                                 | 0.39                                               | 0.54                                               | 0.70                                               | 0.74                                               |
|------------------------------------------------------------------------------------------|----------------------------------------------------|----------------------------------------------------|----------------------------------------------------|----------------------------------------------------|
| Temp. / K                                                                                | 293(2)                                             | 293(2)                                             | 293(2)                                             | 293(2)                                             |
| Wavelength / Å                                                                           | 0.71073                                            | 0.71073                                            | 0.71073                                            | 0.71073                                            |
| Formula weight                                                                           | 537.40                                             | 534.89                                             | 532.18                                             | 531.57                                             |
| Space group                                                                              | <i>P</i> 2 <sub>1</sub> / <i>c</i>                 |
| CCDC no.                                                                                 | 2210276                                            | 2210277                                            | 2210278                                            | 2210282                                            |
| Crystal system                                                                           | Monoclinic                                         | Monoclinic                                         | Monoclinic                                         | Monoclinic                                         |
| <i>a</i> / Å                                                                             | 12.1691(17)                                        | 12.1259(5)                                         | 12.125(11)                                         | 12.1396(12)                                        |
| <i>b</i> / Å                                                                             | 26.251(4)                                          | 26.0819(12)                                        | 25.88(2)                                           | 26.017(3)                                          |
| <i>c</i> / Å                                                                             | 7.3843(9)                                          | = 7.3514(3)                                        | 7.344(6)                                           | 7.3495(7)                                          |
| $\beta$ / °                                                                              | 102.348(5)                                         | 102.2104(12)                                       | 101.78(3)                                          | 102.038(4)                                         |
| <i>V</i> / Å <sup>3</sup> , <i>Z</i>                                                     | 2304.3(6), 4                                       | 2272.40(17), 4                                     | 2256(3), 4                                         | 2270.1(4), 4                                       |
| $\rho$ / g·cm <sup>-3</sup>                                                              | 1.549                                              | 1.563                                              | 1.567                                              | 1.555                                              |
| $\mu$ / mm <sup>-1</sup>                                                                 | 1.297                                              | 1.298                                              | 1.289                                              | 1.277                                              |
| <i>F</i> (000)                                                                           | 1088                                               | 1083                                               | 1078                                               | 1076                                               |
| $\theta$ Range for data collection (°)                                                   | 2.891–25.498                                       | 2.322–25.499                                       | 2.919–25.497                                       | 2.909–25.498                                       |
|                                                                                          | -14 ≤ <i>h</i> ≤ 14                                |
| Index ranges                                                                             | -31 ≤ <i>k</i> ≤ 31                                | -31 ≤ <i>k</i> ≤ 31                                | -31 ≤ <i>k</i> ≤ 28                                | -31 ≤ <i>k</i> ≤ 31                                |
|                                                                                          | -8 ≤ <i>l</i> ≤ 8                                  |
| <i>R</i> <sub>int</sub>                                                                  | 0.0821                                             | 0.1442                                             | 0.0562                                             | 0.0692                                             |
| Reflect./restraints /parameters                                                          | 4265 / 0 / 281                                     | 4232 / 0 / 281                                     | 4192 / 0 / 281                                     | 4226 / 0 / 281                                     |
| Refinement method                                                                        | Full-matrix least-squares on <i>F</i> <sup>2</sup> |
| Goodness of fit on <i>F</i> <sup>2</sup>                                                 | 1.074                                              | 1.044                                              | 1.159                                              | 1.136                                              |
| <i>R</i> <sub>1</sub> , <i>wR</i> <sub>2</sub> <sup>a</sup> [ <i>I</i> > 2σ( <i>I</i> )] | 0.0530, 0.0988                                     | 0.0426, 0.0929                                     | 0.0703, 0.1097                                     | 0.0614, 0.0958                                     |
| <i>R</i> <sub>1</sub> , <i>wR</i> <sub>2</sub> <sup>a</sup> [all data]                   | 0.0796, 0.1055                                     | 0.0777, 0.1030                                     | 0.0999, 0.1160                                     | 0.0865, 0.1015                                     |
| Residual / e·Å <sup>-3</sup>                                                             | 0.316/ -0.438                                      | 0.245/ -0.322                                      | 0.559/ -0.543                                      | 0.423/ -0.506                                      |

## Continue to Table S1

| <i>x</i>                                                                                 | 0.87                                                  | 1                                                     |
|------------------------------------------------------------------------------------------|-------------------------------------------------------|-------------------------------------------------------|
| Temp. / K                                                                                | 293(2)                                                | 293(2)                                                |
| Wavelength / Å                                                                           | 0.71073                                               | 0.71073                                               |
| Formula weight                                                                           | 529.47                                                | 527.29                                                |
| Space group                                                                              | <i>P</i> 2 <sub>1</sub> / <i>c</i>                    | <i>P</i> 2 <sub>1</sub> / <i>c</i>                    |
| CCDC no.                                                                                 | 2210273                                               | 182194                                                |
| Crystal system                                                                           | Monoclinic                                            | Monoclinic                                            |
| <i>a</i> / Å                                                                             | 12.1411(5)                                            | 12.1500(4)                                            |
| <i>b</i> / Å                                                                             | 25.9867(11)                                           | 25.9523(6)                                            |
| <i>c</i> / Å                                                                             | 7.3406(3)                                             | 7.3397(3)                                             |
| $\beta$ / °                                                                              | 101.8663(14)                                          | 101.74                                                |
| <i>V</i> / Å <sup>3</sup> , <i>Z</i>                                                     | 2266.52(16), 4                                        | 2265.95(13), 4                                        |
| $\rho$ / g·cm <sup>-3</sup>                                                              | 1.552                                                 | 1.546                                                 |
| $\mu$ / mm <sup>-1</sup>                                                                 | 1.265                                                 | 1.251                                                 |
| <i>F</i> (000)                                                                           | 1072                                                  | 1068                                                  |
| $\theta$ Range for data collection (°)                                                   | 2.910–25.494                                          | 1.57–25.05                                            |
|                                                                                          | -14 ≤ <i>h</i> ≤ 14                                   | -14 ≤ <i>h</i> ≤ 12                                   |
| Index ranges                                                                             | -31 ≤ <i>k</i> ≤ 31                                   | -19 ≤ <i>k</i> ≤ 30                                   |
|                                                                                          | -8 ≤ <i>l</i> ≤ 8                                     | -8 ≤ <i>l</i> ≤ 8                                     |
| <i>R</i> <sub>int</sub>                                                                  | 0.0418                                                | 0.0436                                                |
| Reflect./restraints /parameters                                                          | 4217 / 0 / 281                                        | 4013 / 0 / 281                                        |
| Refinement method                                                                        | Full-matrix least-squares<br>on <i>F</i> <sup>2</sup> | Full-matrix least-squares<br>on <i>F</i> <sup>2</sup> |
| Goodness of fit on <i>F</i> <sup>2</sup>                                                 | 1.148                                                 | 1.046                                                 |
| <i>R</i> <sub>1</sub> , <i>wR</i> <sub>2</sub> <sup>a</sup> [ <i>I</i> > 2σ( <i>I</i> )] | 0.0482, 0.0934                                        | 0.0619, 0.1535                                        |
| <i>R</i> <sub>1</sub> , <i>wR</i> <sub>2</sub> <sup>a</sup> [all data]                   | 0.0614, 0.0970                                        | 0.0994, 0.1804                                        |
| Residual / e·Å <sup>-3</sup>                                                             | 0.346/-0.419                                          | 0.879/-0.659                                          |

Table S2: Coordinated bond lengths (Å) and angles (°) in an anionic moiety for  $[F_xCl_{1-x}\text{-BzPy}][\text{Ni}(\text{mnt})_2]$  ( $x = 0\text{--}1$ )

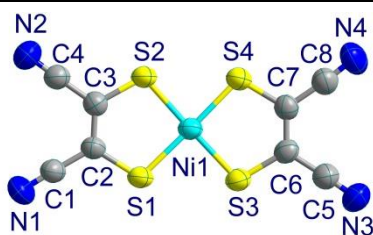

| $x$  | Ni–S1      | Ni–S2      | Ni–S3      | Ni–S4      | S1–Ni–S2 | S3–Ni–S4 |
|------|------------|------------|------------|------------|----------|----------|
| 0    | 2.1447(12) | 2.1392(12) | 2.1510(12) | 2.1395(12) | 92.17(5) | 92.37(5) |
| 0.07 | 2.1436(8)  | 2.1409(8)  | 2.1531(8)  | 2.1409(8)  | 92.15(3) | 92.41(3) |
| 0.15 | 2.1651(14) | 2.1628(14) | 2.1745(14) | 2.1604(14) | 91.96(7) | 92.24(7) |
| 0.25 | 2.1457(8)  | 2.1423(8)  | 2.1551(8)  | 2.1405(8)  | 92.18(3) | 92.43(3) |
| 0.39 | 2.1530(11) | 2.1486(11) | 2.1618(11) | 2.1468(11) | 92.13(4) | 92.38(4) |
| 0.54 | 2.1395(9)  | 2.1394(9)  | 2.1489(9)  | 2.1394(10) | 92.23(4) | 92.41(4) |
| 0.70 | 2.141(2)   | 2.134(2)   | 2.146(2)   | 2.134(2)   | 92.61(9) | 92.89(9) |
| 0.74 | 2.1446(12) | 2.1411(12) | 2.1526(12) | 2.1396(12) | 92.24(5) | 92.45(5) |
| 0.87 | 2.1435(10) | 2.1417(10) | 2.1537(10) | 2.1391(10) | 92.24(4) | 92.42(4) |
| 1    | 2.1454(14) | 2.1441(14) | 2.1516(14) | 2.1412(15) | 92.27(6) | 92.46(6) |

Table S3: The parameters ( $\alpha$ ,  $\Delta/k_B$ ,  $C$  and  $\theta$ ) obtained by fitting the temperature dependent magnetic susceptibilities in LTP

| $x$                     | 0        | 0.07     | 0.15     | 0.25     | 0.39     |
|-------------------------|----------|----------|----------|----------|----------|
| $\alpha$                | 17(4)    | 6(2)     | 5(2)     | 13(2)    | 13(3)    |
| $\Delta/k_B / \text{K}$ | 598(23)  | 526(33)  | 517(42)  | 591(17)  | 586(23)  |
| $C / (10^{-3})$         | 3.70(9)  | 2.66(8)  | 2.76(5)  | 1.02(4)  | 1.06(6)  |
| emu K mol <sup>-1</sup> |          |          |          |          |          |
| $\theta / \text{K}$     | -0.4(1)  | -1.9(3)  | -2.8 (4) | -0.1(1)  | -0.4(2)  |
| $\chi_0 / (10^{-4})$    | -4.49(5) | -3.93(7) | -4.44(9) | -3.64(2) | -3.92(3) |
| emu mol <sup>-1</sup>   |          |          |          |          |          |
| Temp. range / K         | 2-93     | 2-93     | 2-93     | 2-91     | 2-91     |
| $x$                     | 0.54     | 0.70     | 0.74     | 0.87     | 1        |
| $\alpha$                | 12(6)    | 12(4)    | 11(4)    | 10(6)    | 7(3)     |
| $\Delta/k_B / \text{K}$ | 544(42)  | 571(27)  | 541(34)  | 508(45)  | 551(34)  |
| $C / (10^{-3})$         | 4.58(5)  | 1.94(5)  | 2.93(9)  | 6.06(7)  | 1.76(2)  |
| emu K mol <sup>-1</sup> |          |          |          |          |          |
| $\theta / \text{K}$     | -4.4(5)  | -0.5(1)  | -0.5(1)  | -0.5(1)  | -6 (1)   |
| $\chi_0 / (10^{-4})$    | -3.47(1) | -3.70(3) | -4.04(5) | -4.26(9) | -3.01(5) |
| emu mol <sup>-1</sup>   |          |          |          |          |          |
| Temp. range / K         | 2-87     | 2-85     | 2-84     | 2-83     | 2-89     |

Table S4: The parameter  $J/k_B$  and temperature range of fitted susceptibility data in HTP

|                    |         |          |                    |         |         |
|--------------------|---------|----------|--------------------|---------|---------|
| $x$                | 0       | 0.07     | 0.15               | 0.25    | 0.39    |
| $J/k_B / \text{K}$ | 0.4(8)  | -11.5(7) | -27.5( $\pm 1.3$ ) | -6.7(4) | -7.2(4) |
| Temp. range / K    | 112–300 | 125–300  | 122–300            | 110–300 | 110–300 |
| $x$                | 0.54    | 0.70     | 0.74               | 0.87    | 1       |
| $J/k_B / \text{K}$ | 1.5(7)  | 2.8(6)   | 5.9(6)             | 4.9(5)  | 7.8(4)  |
| Temp. range / K    | 108–300 | 105–300  | 101–300            | 97–300  | 93–300  |

Table S5: The parameter  $J/k_B$  and temperature range of fitted susceptibility data in HTP

|                    |                  |                  |                  |                  |         |
|--------------------|------------------|------------------|------------------|------------------|---------|
| $x$                | 0                | 0.07             | 0.15             | 0.25             | 0.39    |
| $J/k_B / \text{K}$ | 1.2( $\pm 2.4$ ) | -4.3(1)          | -13.3(1)         | -2.9(2)          | -2.8(1) |
| Temp. range / K    | 112–300          | 125–300          | 122–300          | 110–300          | 110–300 |
| $x$                | 0.54             | 0.70             | 0.74             | 0.87             | 1       |
| $J/k_B / \text{K}$ | 3.1( $\pm 1.8$ ) | 4.9( $\pm 1.6$ ) | 8.4( $\pm 1.5$ ) | 9.8( $\pm 1.2$ ) | 15.9(4) |
| Temp. range / K    | 108–300          | 105–300          | 101–300          | 97–300           | 93–300  |

Table S6: The parameter  $\theta$  and temperature ranges of susceptibility data fitted in HTP

|                     |         |         |          |         |         |
|---------------------|---------|---------|----------|---------|---------|
| $x$                 | 0       | 0.07    | 0.15     | 0.25    | 0.39    |
| $\theta / \text{K}$ | 2.5(2)  | -5.7(1) | -17.1(1) | -3.9(3) | -3.8(3) |
| Temp. range / K     | 112–300 | 125–300 | 122–300  | 110–300 | 110–300 |
| $x$                 | 0.54    | 0.70    | 0.74     | 0.87    | 1       |
| $\theta / \text{K}$ | 5.8(3)  | 8.9(3)  | 14.1(2)  | 15.8(1) | 23.0(1) |
| Temp. range / K     | 108–300 | 105–300 | 101–300  | 97–300  | 93–300  |
